# Supplementary material
Source: Research Square preprint supplement (doi:10.21203/rs.3.rs-9546723/v1)
Supplement: Supplementary file 1 [file 2a5055af0a3e6498b38a5405.docx]

*Pediatric Surgery International*

**Title: Long-term medical support after definitive surgery for esophageal atresia: Analysis using a national inpatient database in Japan**

**Authors:** Yoshitsugu Yanagida, MD1,2, Shotaro Aso, MD, PhD3, Michimasa Fujiogi, MD, PhD1, Kosuke Kirino, MD4, Tetsuya Ishimaru, MD, PhD5, Kenji Santo, MD, PhD 6, Shuichiro Uehara, MD, PhD6, Tomoaki Taguchi, MD, PhD7, Kensuke Yoshimura MD, MPH, PhD2,8, Hideo Yasunaga, MD, PhD2, Jun Fujishiro, MD, PhD 1

1 Department of Pediatric Surgery, Graduate School of Medicine, The University of Tokyo, 7-3-1 Hongo, Bunkyo-ku, Tokyo 113-0033, Japan

2 Department of Clinical Epidemiology and Health Economics, School of Public Health, The University of Tokyo, 7-3-1 Hongo, Bunkyo-ku, Tokyo 113-0033, Japan

3 Department of Health Services Research, Graduate School of Medicine, The University of Tokyo, 7-3-1 Hongo, Bunkyo-ku, Tokyo 113-0033, Japan

4 Department of Data Science, Clinical Research Center, National Center for Child Health and Development, 2-10-1 Okura, Setagaya-ku, Tokyo 157-8535, Japan

5 Division of Surgery, Department of Surgical Specialties, National Center for Child Health and Development, 2-10-1 Okura, Setagaya-ku, Tokyo 157-8535, Japan

6 Department of Pediatric Surgery, Nihon University School of Medicine, 1-1-5 Sendagi, Bunkyo-ku, Tokyo 113-8603, Japan.

7 President, Fukuoka College of Health Sciences, 2-15-1 Tamura, Sawara-ku, Fukuoka 814-0139, Japan

8 Center for Next Generation of Community Health, Chiba University Hospital, 1-8-1, Inohana, Chuo-ku, Chiba-shi, Chiba 260-8677, Japan

Corresponding author: Jun Fujishiro, M.D., Ph.D.

Department of Pediatric Surgery, Graduate School of Medicine, The University of Tokyo

E-mail: FUJISHIROJ-PSU@h.u-tokyo.ac.jp

Phone: +81-3-5841-3303

Fax: +81-3-5841-8585

Present address: 7-3-1 Hongo, Bunkyo-ku, Tokyo, 113-0033, Japan

Index

[Table S1. Definitions of all home medical care modalities 4](#_Toc228260551)

[Table S2. Definitions of all medications 5](#_Toc228260552)

# Table S1. Definitions of all home medical care modalities

| Home medical care | Procedure | Medical device |
| --- | --- | --- |
| Home tracheostomy care | C112 Management fee for home tracheostomy care K403-23 Laryngotracheal separation* | Tracheostomy tube |
| Home ventilation therapy | C107 Management fee for home ventilation  C107-2 Management fee for home continuous positive airway pressure |  |
| Home oxygen therapy | C103 Management fee for home oxygen therapy |  |
| Home enteral nutrition | C105 Management fee for home enteral nutrition | Gastrostomy tube  Enterostomy tube |
| * In patients who underwent laryngotracheal separation, the duration of home tracheostomy care was defined as the period  from laryngotracheal separation to the end of the observation period. | | |

# Table S2. Definitions of all medications

| Medication | Drugs |
| --- | --- |
| Antacids | Proton pump inhibitors (omeprazole, lansoprazole, rabeprazole, esomeprazole, vonoprazan) Histamine H2 receptor blockers (cimetidine, nizatidine, roxatidine, lafutidine, famotidine) |
| Prokinetic agents | Mosapride Acotiamide Rikkunsi-to (Japanese herbal medicine) |
| Anti-asthmatic agents | Xanthine (diprophylline, theophylline, aminophylline, proxyphilline)  Leukotriene receptor antagonists (montelukast, pranlukast)  Mediator release inhibitors (tranilast, ibudilast, pemirolast)  Thoromboxane-A2 synthase inhibitors (ozagrel, seratradast, ramatroban) Th2 cytokine inhibitors (suplatast) Short-acting beta-stimulant inhalers (isoprenaline hydrochloride, salbutamol sulfate, fenoterol, procaterol)  Oral beta-stimulants (isoprenaline hydrochloride, salbutamol sulfate, terbutaline sulfate, fenoterol hydrobromide, procaterol hydrochloride, tulobuterol)  Tape beta-stimulants (tulobuterol)  Inhaled corticosteroids (beclomethasone dipropionate, fluticasone propionate, budesonide, ciclesonide, mometasone furoate, fluticasone furoate) Long-acting beta-stimulant inhalers (formoterol fumarate hydrate, salmeterol xinafoate, indacaterol malate) Combined long-acting beta-stimulant and corticosteroid inhalers (fluticasone propionate + salmeterol xinafoate, budesonide + formoterol fumarate hydrate, fluticasone furoate + formoterol fumarate hydrate, fluticasone furoate + vilanterol trifenatate, mometasone furoate, fluticasone furoate + indacaterol acetate) |
